# Supplementary material
Source: publisher site journal article supplement (http://content.karger.com/ProdukteDB/miscArchiv/000/158/573/Suppl.Tables.pdf)
Supplement: Supplementary file 1 [file Suppl.Tables.pdf]

**Table A. Clinico-pathological information of the cases in which the presence of TADDI -ir was studied**

| Number                                        | Age | Sex | PmD   | Fix | Bw   | APOE | BS | Cause of death                                                       |
|-----------------------------------------------|-----|-----|-------|-----|------|------|----|----------------------------------------------------------------------|
| <b>TADDI distribution in the brain</b>        |     |     |       |     |      |      |    |                                                                      |
| 1)                                            | 38  | m   | 10:45 | 37  | 1618 | 33   | 0  | Wegener's disease                                                    |
| 2)                                            | 41  | f   | 13:30 |     | 1263 | 43   |    | adenocarcinoma of the bronchus,<br>massive lung bleeding             |
| 3)                                            | 62  | m   | 09:35 | 33  | 1175 | 33   | 0  | adenocarcinoma of the pancreas,<br>rupture of the ileum, peritonitis |
| 4)                                            | 73  | m   | 05:00 | 32  | 1075 | 43   | 6C | AD, cachexia                                                         |
| 5)                                            | 77  | f   | 08:30 | 51  | 1102 | 44   | 6C | AD, dehydration                                                      |
| 6)                                            | 77  | f   | 08:20 | 42  | 1312 | 32   | 1A | cachexia, uremia                                                     |
| <b>TADDI distribution in the hypothalamus</b> |     |     |       |     |      |      |    |                                                                      |
| 1)                                            | 25  | m   | 18:30 | 44  | 1500 |      |    | NDC, diabetes mellitus, pneumonia                                    |
| 2)                                            | 28  | f   | 05:25 | 44  |      |      |    | NDC, myocardial infarction                                           |
| 3)                                            | 46  | f   | 11:00 | 19  | 1300 |      |    | NDC, unknown                                                         |
| 4)                                            | 47  | m   | 33:45 | 28  | 1307 |      |    | NDC, bronchial carcinoma with<br>metastases                          |
| 5)                                            | 78  | f   | 07:30 | 6   | 1330 | 43   | 2  | NDC, pulmonary emphysema, heart<br>failure                           |

Abbreviations: AD – Alzheimer's disease, APOE – apolipoprotein genotype, BS – Braak stage, Bw – brain weight (in grams), f – female, Fix – fixation time (days), m – male, NDC – non-demented control, PmD – postmortem delay (hours and minutes), TADDI – hippocampal ER $\alpha$  splice variant TADDI immunoreactivity.

**Table B. Clinico-pathological information of the cases in which TADDI-ir was quantified in the NBM, SON and TMN.**

**Young control cases**

| <b>Nº</b> | <b>Age</b> | <b>Sex</b> | <b>PmD</b> | <b>Fix</b> | <b>Bw</b> | <b>Cause of death</b>                                       |
|-----------|------------|------------|------------|------------|-----------|-------------------------------------------------------------|
| 1)        | 20         | m          | 08:00      | 82         | 1490      | heart failure, pneumonia, B-cell lymphoma                   |
| 2)        | 21         | f          | 19:35      | 65         | 975       | myocardial infarction                                       |
| 3)        | 25         | m          | 18:30      | 44         | 1500      | diabetes mellitus, pneumonia                                |
| 4)        | 27         | m          |            |            |           | drowning                                                    |
| 5)        | 28         | f          | 05:25      | 44         |           | myocardial infarction                                       |
| 6)        | 29         | f          | 13:10      | 60         | 1150      | hepatic coma                                                |
| 7)        | 32         | f          | 30:00      | 45         | 1280      | bronchopneumonia                                            |
| 8)        | 32         | f          | <41:00     | 45         | 1287      | pulmonary hypertension                                      |
| 9)        | 33         | m          | 18:45      | 32         | 1410      | motor accident                                              |
| 10)       | 35         | m          | 13:30      | 1214       | 1430      | respiratory insufficiency                                   |
| 11)       | 35         | f          | 08:00      | 26         | 1200      | acute lymphoblastic leukemia                                |
| 12)       | 38         | f          | 53:30      | 1113       | 1260      | pneumonia, respiratory insufficiency                        |
| 13)       | 38         | m          | 10:45      | 37         | 1618      | Wegener's disease                                           |
| 14)       | 40         | f          | <41:00     | 54         | 1279      | pulmonary carcinoma                                         |
| 15)       | 41         | f          | <72:25     | 69         | 1335      | subdural haematoma, coma                                    |
| 16)       | 43         | m          | <17:00     | 1293       | 1720      | unknown                                                     |
| 17)       | 43         | m          | 09:15      | 130        | 1380      | pneumonia                                                   |
| 18)       | 44         | m          | <41:00     | 123        | 1434      | multiple organ failure, bronchopneumonia                    |
| 19)       | 46         | f          | 11:00      | 19         | 1300      | unknown                                                     |
| 20)       | 46         | f          | 10:25      | 35         | 1197      | cardiogenic shock                                           |
| 21)       | 47         | m          | 33:45      | 28         | 1307      | bronchial carcinoma with metastases                         |
| 22)       | 47         | m          | <82:30     | 105        | 1420      | cardiac arrest                                              |
| 23)       | 49         | f          | <41:00     | 32         | 1260      | lung carcinoma with metastases                              |
| 24)       | 49         | f          | <17:00     | 806        | 1253      | massive thromboembolisms                                    |
| 25)       | 49         | f          | <13:30     | 165        | 1437      | respiratory insufficiency, cervix carcinoma with metastases |
| 26)       | 50         | f          | 43:10      | 31         | 1219      | pneumonia, sepsis                                           |
| 27)       | 50         | f          | <41:00     | 72         | 1350      | euthanasia, pancoast tumor with metastases                  |
| 28)       | 50         | m          | 08:30      | 41         | 1436      | cardiac arrest                                              |

### Elderly control cases

| <b>№</b> | <b>Age</b> | <b>Sex</b> | <b>PmD</b> | <b>Fix</b> | <b>Bw</b> | <b>APOE</b> | <b>BS</b> | <b>Cause of death</b>                                    |
|----------|------------|------------|------------|------------|-----------|-------------|-----------|----------------------------------------------------------|
| 1)       | 56         | m          | 05:00      | 35         | 1357      | 33          | 0         | unknown                                                  |
| 2)       | 58         | m          | <17:00     | 96         | 1408      |             | 0         | aorta dissection                                         |
| 3)       | 58         | f          | 06:45      | 28         | 1221      |             |           | postoperative coma                                       |
| 4)       | 60         | f          | <08:06     | 87         |           |             | 0         | ovarian carcinoma                                        |
| 5)       | 61         | f          | 05:15      | 28         | 1311      | 32          | 0         | glioblastoma, coma                                       |
| 6)       | 63         | m          | 10:20      | 32         | 1250      | 32          | 0         | myocardial infarction,<br>Wernicke's/Korsakov's syndrome |
| 7)       | 63         | m          | 01:40      | 65         | 1368      |             | 0         | pneumonia, ventricular tachycardia                       |
| 8)       | 63         | m          | 26:45      | 29         | 1154      | 32          | 0         | pulmonary infection, abscess in the abdomen              |
| 9)       | 64         | f          | 08:35      | 36         | 1169      | 42          | 0B        | bowel perforation, myocardial infarction                 |
| 10)      | 65         | f          | <20:00     | 55         |           |             | 0         | right hemicolectomy, mesenterial ischemia                |
| 11)      | 66         | m          | <41:00     | 49         | 1461      |             |           | septic shock, adenocarcinoma of the stomach              |
| 12)      | 68         | m          | 07:17      | 47         | 1366      | 33          | 1         | myocardial infarction                                    |
| 13)      | 68         | m          | <41:00     | 150        | 1157      |             |           | pneumonia, respiratory insufficiency                     |
| 14)      | 69         | f          | 06:15      | 31         | 1264      | 33          | 1         | myocardial infarction                                    |
| 15)      | 71         | m          | 07:40      | 38         | 1190      | 33          | 10        | sepsis, respiratory insufficiency                        |
| 16)      | 72         | m          | 06:45      | 34         | 1383      | 43          | 0         | heart failure                                            |
| 17)      | 72         | f          | 65:30      | 56         |           |             | 1A        | bronchopneumonia                                         |
| 18)      | 73         | f          | 08:00      | 34         | 1344      |             | 0         | bronchopneumonia, cardiac and septic shock               |
| 19)      | 74         | m          | 08:00      | 60         | 1317      | 32          | 0         | myocardial infarction                                    |
| 20)      | 74         | f          | 07:25      | 31         | 1207      | 32          | 20        | intestinal thrombosis and necrosis                       |
| 21)      | 77         | f          | 02:40      | 47         | 1235      | 33          | 10        | carcinoma of the pancreas, septic shock                  |
| 22)      | 77         | f          | <52:00     | 56         | 1255      |             | 2         | myocardial infarction                                    |
| 23)      | 80         | m          | 06:56      | 33         | 1380      | 33          | 0         | respiratory insufficiency, lung emphysema,<br>pneumonia  |
| 24)      | 82         | m          | <89:00     | 63         |           |             | 10        | lung carcinoma with metastases, lung<br>infarction       |
| 25)      | 82         | f          | 10:45      | 35         | 1078      | 43          | 1C        | atrial fibrillation, respiratory insufficiency           |
| 26)      | 84         | f          | 11:00      | 81         | 1201      |             | 2         | sudden death                                             |
| 27)      | 84         | m          | 09:00      | 30         | 1367      | 33          | 1         | heart failure, uremia                                    |
| 28)      | 85         | f          | 05:11      | 28         | 925       | 33          | 0C        | pneumonia                                                |
| 29)      | 89         | f          | 05:10      | 36         | 1168      | 32          | 20        | cardiac arrest                                           |
| 30)      | 90         | f          | 06:10      | 25         | 1119      | 33          | 3A        | cardiac arrest                                           |
| 31)      | 94         | f          | 06:10      | 29         | 1118      | 33          | 1         | pneumonia, sepsis                                        |

### Alzheimer's disease cases

| <b>№</b> | <b>Age</b> | <b>Sex</b> | <b>PmD</b> | <b>Fix</b> | <b>Bw</b> | <b>APOE</b> | <b>BS</b> | <b>Cause of death</b>                 |
|----------|------------|------------|------------|------------|-----------|-------------|-----------|---------------------------------------|
| 1)       | 54         | f          | 03:15      | 28         | 1055      | 33          | 5C        | AD, cachexia                          |
| 2)       | 57         | m          | 05:00      | 45         | 1690      | 43          | 6C        | AD, pneumonia, urosepsis              |
| 3)       | 58         | m          | 04:45      | 32         | 1350      | 43          | 6         | AD, cachexia, pulmonary insufficiency |
| 4)       | 58         | m          | 05:10      | 27         | 1290      | 33          | 6C        | AD, cachexia                          |
| 5)       | 60         | f          | 03:45      | 29         | 1060      | 33          | 6         | AD, sudden death                      |
| 6)       | 61         | m          | 06:05      | 30         | 1180      | 33          | 6         | AD, cachexia                          |
| 7)       | 63         | m          | 05:00      | 30         | 1350      | 33          | 6         | AD, pneumonia                         |
| 8)       | 63         | m          | 06:00      | 31         | 1251      | 44          | 6         | AD, acute agranulocytosis, sepsis     |
| 9)       | 64         | m          | 03:40      | 30         | 1050      | 43          | 6C        | AD                                    |
| 10)      | 65         | f          | 02:35      | 121        | 1175      | 43          | 6         | AD, cachexia                          |
| 11)      | 69         | f          | 04:00      | 33         | 1150      | 33          | 6         | AD, pneumonia                         |
| 12)      | 69         | m          | 02:55      | 29         | 1362      | 44          | 5C        | AD, bronchopneumonia                  |
| 13)      | 72         | m          | 04:45      | 33         | 1092      | 33          | 5         | AD, cardiac failure                   |
| 14)      | 72         | m          | 05:15      | 26         | 1520      | 43          | 5         | AD, pneumonia                         |
| 15)      | 76         | f          | 03:40      | 32         | 1068      | 42          | 6C        | AD, cardiac arrest                    |
| 16)      | 77         | f          | 03:00      | 28         | 1368      | 44          | 6         | AD, cachexia                          |
| 17)      | 79         | m          | 05:45      | 47         | 959       | 43          | 4C        | AD, pneumonia                         |
| 18)      | 80         | f          | 02:15      | 57         | 1139      | 43          | 6         | AD                                    |
| 19)      | 81         | f          | 04:50      | 40         | 1049      | 43          | 6         | AD, cardiac decompensation            |
| 20)      | 82         | m          | 04:15      | 32         | 1317      | 44          | 5         | AD, cachexia                          |
| 21)      | 83         | f          | 04:55      | 36         | 953       | 43          | 5C        | AD                                    |
| 22)      | 84         | f          | 04:40      | 27         | 1080      | 43          | 5C        | AD, cachexia, dehydration             |
| 23)      | 85         | f          | 01:35      | 32         | 1043      |             | 6         | AD, dehydration, pneumonia            |
| 24)      | 87         | f          | 06:20      | 27         | 1115      | 43          | 5         | AD, cardiac decompensation            |
| 25)      | 94         | f          | 03:50      | 32         | 882       | 43          | 5         | AD, dehydration, cachexia             |

Abbreviations: AD – Alzheimer's disease, APOE – apolipoprotein genotype, BS – Braak stage, Bw – brain weight (in grams), f – female, Fix – fixation time (days), m – male, NBM – the nucleus basalis of Meynert, NDC – non-demented control, PmD – postmortem delay (hours and minutes), SON – the supraoptic nucleus, TADDI – hippocampal ER $\alpha$  splice variant TADDI immunoreactivity, TMN – the tuberomamillary nucleus.

**Table C. Clinico-pathological information of the cases in which TADDI-ir was quantified in the hippocampus.**

| Nº                                                                       | sex | age | Bw   | BS | Neuropathological diagnosis, cause of death                      |
|--------------------------------------------------------------------------|-----|-----|------|----|------------------------------------------------------------------|
| <b>Premenopausal and perimenopausal women (chronological definition)</b> |     |     |      |    |                                                                  |
| 1)                                                                       | f   | 34  | 1395 |    | NDC, cardiac abnormalities, cachexia                             |
| 2)                                                                       | f   | 40  | nr   |    | NDC, gastric leiomyosarcoma                                      |
| 3)                                                                       | f   | 40  | 1279 |    | NDC, pulmonary carcinoma                                         |
| 4)                                                                       | f   | 41  | 1335 |    | NDC, subdural hematoma                                           |
| 5)                                                                       | f   | 43  | 1345 |    | NDC, myocardial infarction                                       |
| 6)                                                                       | f   | 43  | 1438 |    | NDC, respiratory insufficiency                                   |
| 7)                                                                       | f   | 49  | 1437 |    | NDC, respiratory insufficiency, cervix carcinoma with metastases |
| 8)                                                                       | f   | 50  | 1350 |    | NDC, euthanasia                                                  |
| 9)                                                                       | f   | 50  | 1333 |    | NDC, hypovolemic shock, adenocarcinoma of the pancreas           |
| <b>Postmenopausal women</b>                                              |     |     |      |    |                                                                  |
| 10)                                                                      | f   | 63  | 1216 | 0  | NDC, breast carcinoma, euthanasia                                |
| 11)                                                                      | f   | 73  | 1360 | 0  | NDC, lung fibrosis, rhabdomyolysis, renal insufficiency          |
| 12)                                                                      | f   | 78  | 1250 | 1  | NDC, myocardial infarction                                       |
| 13)                                                                      | f   | 82  | 1195 | 1  | NDC, congestive cardiac failure                                  |
| 14)                                                                      | f   | 83  | 1000 | 1  | NDC, euthanasia, carcinoma of the colon                          |
| <b>Alzheimer's disease women</b>                                         |     |     |      |    |                                                                  |
| 15)                                                                      | f   | 65  | 954  | 6  | AD, cachexia                                                     |
| 16)                                                                      | f   | 73  | 1033 | 6  | AD, dehydration                                                  |
| 17)                                                                      | f   | 74  | 1070 | 6  | AD, pneumonia, cachexia                                          |
| 18)                                                                      | f   | 82  | 1118 | 5  | AD, hyperinsulinemia                                             |
| 19)                                                                      | f   | 85  | 1082 | 6  | AD, bronchopneumonia                                             |
| <b>Control male patients</b>                                             |     |     |      |    |                                                                  |
| 20)                                                                      | m   | 31  | 1585 |    | NDC, acute death, arithmogenuous right chamber dysplasia         |
| 21)                                                                      | m   | 34  | 1419 |    | NDC, intoxication                                                |
| 22)                                                                      | m   | 44  | 1434 |    | NDC, multiple organ failure, bronchopneumonia                    |
| 23)                                                                      | m   | 44  | 1565 |    | NDC, myocardial infarction                                       |
| 24)                                                                      | m   | 50  | nr   |    | NDC, lung emboly                                                 |

Abbreviations used: AD – Alzheimer's disease; BS – Braak stage for tangles; Bw – brain weight in grams; f – female; m – male; NBB – Netherlands Brain Bank; NDC – non-demented control; nr – not recorded.
